# Supplementary material for: Cadm2 regulates body weight and energy homeostasis in mice
Source: PubMed Central journal article supplement — Mol Metab. 2017 Nov 22;8:180–8. doi: 10.1016/j.molmet.2017.11.010 (PMC5985021; doi:10.1016/j.molmet.2017.11.010), 2017-11-22
Supplement: mmc1.pdf [file mmc1.pdf]

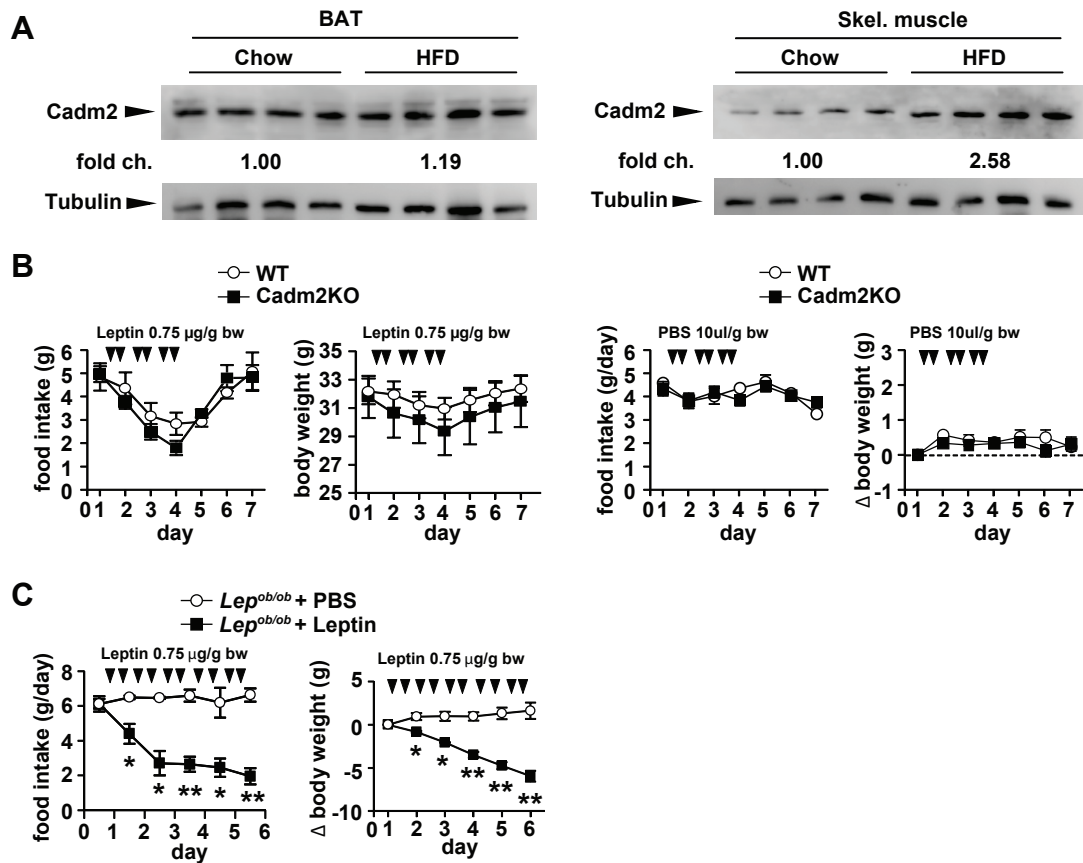

**Supplementary Figure 1. Cadm2 expression in high fat diet fed tissues and food and body weight measurements after leptin injection.** **A**, Western blot analysis of Cadm2 in total lysates from BAT and skeletal muscle of wild type mice on normal chow diet and littermate controls on high fat diet (HFD) feeding. **B**, Quantification of food intake and body weight in 11-week old Cadm2KO and littermate controls during leptin challenge (n=4) or PBS injected vehicle control (n=5-6). Daily food intake and body weight was measured for 5 days prior to leptin administration for base line. **C**, Quantification of food intake and body weight change in 11-week old *Lep<sup>ob/ob</sup>* mice during leptin (n=4) or PBS injection (n=3). Results are presented as mean ± SEM. \*P<0.05, \*\* P<0.01, \*\*\* P<0.001.

**Supplementary Table 1. Summary of statistical analyses**

| Figure | Sample size (n)                                                   | Statistical Test                                                               | Values                                                                                                                                                                                                                                                                                                                                                                                                                                                                                                                                                                                                                                                                                                                                                                                                                |
|--------|-------------------------------------------------------------------|--------------------------------------------------------------------------------|-----------------------------------------------------------------------------------------------------------------------------------------------------------------------------------------------------------------------------------------------------------------------------------------------------------------------------------------------------------------------------------------------------------------------------------------------------------------------------------------------------------------------------------------------------------------------------------------------------------------------------------------------------------------------------------------------------------------------------------------------------------------------------------------------------------------------|
| 1A     | TT: n=71<br>TG: n=27<br>GG: n=2                                   | Linear regression                                                              | t=3.24, P=0.0018                                                                                                                                                                                                                                                                                                                                                                                                                                                                                                                                                                                                                                                                                                                                                                                                      |
| 1B     | TT: n=57<br>TG: n=23<br>GG: n=2                                   | Linear regression                                                              | t=3.51, P=0.0009                                                                                                                                                                                                                                                                                                                                                                                                                                                                                                                                                                                                                                                                                                                                                                                                      |
| 1C     | TT: n=74<br>TG: n=29<br>GG: n=0                                   | Linear regression                                                              | t=2.92, P=0.0045                                                                                                                                                                                                                                                                                                                                                                                                                                                                                                                                                                                                                                                                                                                                                                                                      |
| 1D     | TT: n=56<br>TG: n=24<br>GG: n=1                                   | Linear regression                                                              | t=2.03, P=0.0467                                                                                                                                                                                                                                                                                                                                                                                                                                                                                                                                                                                                                                                                                                                                                                                                      |
| 2G     | Wild-type (n=19)<br>Cadm2KO (n=9)                                 | Two-way repeated-measure ANOVA<br>Post-hoc multiple comparisons test (Sidak's) | Interaction: F=2.707, P=0.0468<br>Time: F=1027, P<0.0001<br>Genotype: F=37.44, P<0.10001<br>Multiple comparison: *P<0.05                                                                                                                                                                                                                                                                                                                                                                                                                                                                                                                                                                                                                                                                                              |
| 2H     | Wild-type (n=4)<br>Cadm2KO (n=4)                                  | Two-way repeated-measure ANOVA<br>Post-hoc multiple comparisons test (Sidak's) | <u>Food intake:</u><br>Interaction: F=2.22, P=0.0634<br>Time: F=24.94, P<0.0001<br>Genotype: F=2.624, P=0.1564<br>Multiple comparison: *P<0.05<br><u>Body weight:</u><br>Interaction: F=3.343, P=0.0101<br>Time: F=42.26, P<0.0001<br>Genotype: F=5.769, P=0.0532<br>Multiple comparison: *P<0.05                                                                                                                                                                                                                                                                                                                                                                                                                                                                                                                     |
| 3B     | Wild-type (n=19)<br>Lep <sup>ob/ob</sup> (n=13)<br>Cadm2/ob (n=8) | Two-way repeated-measure ANOVA<br>Post-hoc multiple comparisons test (Sidak's) | <u>Lep<sup>ob/ob</sup> vs Cadm2/ob:</u><br>Interaction: F=2.195, P=0.0484<br>Time: F=1983, P<0.0001<br>Genotype: F=37.32, P=0.0025<br>Multiple comparison: 4 weeks, P<0.01; 6 weeks, P<0.001; 8 weeks, P<0.001; 12 weeks, P<0.001; 14 weeks, P<0.001; 16 weeks, P<0.001<br><u>Cadm2/ob vs Wild-type:</u><br>Interaction: F=65.95, P<0.0001<br>Time: F=445.2, P<0.0001<br>Genotype: F=1072, P<0.0001<br>Multiple comparison: 4 weeks, P>0.05; 6 weeks, P<0.001; 8 weeks, P<0.001; 12 weeks, P<0.001; 14 weeks, P<0.001; 16 weeks, P<0.001<br><u>Lep<sup>ob/ob</sup> &amp; Wild-type:</u><br>Interaction: F=104.9, P<0.0001<br>Time: F=624, P<0.0001<br>Genotype: F=2657, P<0.0001<br>Multiple comparison: 4 weeks, P<0.05; 6 weeks, P<0.001; 8 weeks, P<0.001; 12 weeks, P<0.001; 14 weeks, P<0.001; 16 weeks, P<0.001 |
| 3C     | Wild-type (n=7)<br>Lep <sup>ob/ob</sup> (n=3)<br>Cadm2/ob (n=4)   | Two-tailed unpaired Student's t-test                                           | <u>random:</u><br>Lep <sup>ob/ob</sup> vs Cadm2/ob: t=4.289, P=0.0078<br>Cadm2/ob vs Wild-type: t=3.467, P=0.0071<br>Lep <sup>ob/ob</sup> vs Wild-type: t=7.161, P<0.0001                                                                                                                                                                                                                                                                                                                                                                                                                                                                                                                                                                                                                                             |
| 3C     | Wild-type (n=6)<br>Lep <sup>ob/ob</sup> (n=6)<br>Cadm2/ob (n=7)   | Two-tailed unpaired Student's t-test                                           | <u>fasting:</u><br>Lep <sup>ob/ob</sup> vs Cadm2/ob: t=2.232, P=0.0473<br>Cadm2/ob vs Wild-type: t=3.578, P=0.0043<br>Lep <sup>ob/ob</sup> vs Wild-type: t=6.723, P<0.0001                                                                                                                                                                                                                                                                                                                                                                                                                                                                                                                                                                                                                                            |
| 3D     | Wild-type (n=6)<br>Lep <sup>ob/ob</sup> (n=3)<br>Cadm2/ob (n=3)   | Two-tailed unpaired Student's t-test                                           | <u>random:</u><br>Lep <sup>ob/ob</sup> vs Cadm2/ob: t=2.448, P=0.0401<br>Cadm2/ob vs Wild-type: t=2.462, P=0.0490<br>Lep <sup>ob/ob</sup> vs Wild-type: t=5.114, P=0.0009                                                                                                                                                                                                                                                                                                                                                                                                                                                                                                                                                                                                                                             |
| 3D     | Wild-type (n=4)<br>Lep <sup>ob/ob</sup> (n=6)                     | Two-tailed unpaired Student's t-test                                           | <u>fasting:</u><br>Lep <sup>ob/ob</sup> vs Cadm2/ob: t=5.059,                                                                                                                                                                                                                                                                                                                                                                                                                                                                                                                                                                                                                                                                                                                                                         |

|           |                                                                 |                                                                                |                                                                                                                                                                                                                                                                                                                                                                                                                                                                                                                                                                                                                                                                                                                                       |
|-----------|-----------------------------------------------------------------|--------------------------------------------------------------------------------|---------------------------------------------------------------------------------------------------------------------------------------------------------------------------------------------------------------------------------------------------------------------------------------------------------------------------------------------------------------------------------------------------------------------------------------------------------------------------------------------------------------------------------------------------------------------------------------------------------------------------------------------------------------------------------------------------------------------------------------|
|           | Cadm2/ob (n=4)                                                  |                                                                                | P=0.0072<br>Cadm2/ob vs Wild-tyt: t=12.87, P<0.0001<br>Lep <sup>ob/ob</sup> vs Wild-type: t=18.81, P<0.0001                                                                                                                                                                                                                                                                                                                                                                                                                                                                                                                                                                                                                           |
| <b>3E</b> | Wild-type (n=6)<br>Lep <sup>ob/ob</sup> (n=4)<br>Cadm2/ob (n=4) | Two-way repeated-measure ANOVA<br>Post-hoc multiple comparisons test (Sidak's) | Lep <sup>ob/ob</sup> vs Cadm2/ob:<br>Interaction: F=6.795, P=0.0008<br>Time: F=51.96, P<0.0001<br>Genotype: F=88.04, P<0.0001<br>Multiple comparison: 0 min, P>0.05; 15 min, P<0.001; 30 min, P<0.001; 60 min, P<0.001; 120 min, P>0.05<br><u>Cadm2/ob vs Wild-type:</u><br>Interaction: F=49.59, P<0.0001<br>Time: F=93.59, P<0.0001<br>Genotype: F=89.98, P<0.0001<br>Multiple comparison: 0 min, P>0.05; 15 min, P<0.001; 30 min, P<0.001; 60 min, P<0.001; 120 min, P<0.001<br><u>Lep<sup>ob/ob</sup> &amp; Wild-type:</u><br>Interaction: F=40.72, P<0.0001<br>Time: F=42.08, P<0.0001<br>Genotype: F=945.8, P<0.0001<br>Multiple comparison: 0 min, P>0.05; 15 min, P<0.001; 30 min, P<0.001; 60 min, P<0.001; 120 min, P<0.001 |
| <b>3F</b> | Wild-type (n=6)<br>Lep <sup>ob/ob</sup> (n=4)<br>Cadm2/ob (n=4) | Two-way repeated-measure ANOVA<br>Post-hoc multiple comparisons test (Sidak's) | Lep <sup>ob/ob</sup> vs Cadm2/ob:<br>Interaction: F=4.295, P=0.0092<br>Time: F=103.1, P<0.0001<br>Genotype: F=9.811, P=0.0203<br>Multiple comparison: 0 min, P>0.05; 15 min, P>0.05; 30 min, P<0.001; 60 min, P>0.05; 120 min, P>0.05<br><u>Cadm2/ob vs Wild-type:</u><br>Interaction: F=11.23, P<0.0001<br>Time: F=57.12, P<0.0001<br>Genotype: F=13.90, P=0.0058<br>Multiple comparison: 0 min, P>0.05; 15 min, P<0.001; 30 min, P<0.001; 60 min, P>0.05; 120 min, P>0.05<br><u>Lep<sup>ob/ob</sup> &amp; Wild-type:</u><br>Interaction: F=51.11, P<0.0001<br>Time: F=140.6, P<0.0001<br>Genotype: F=42.02, P=0.0002<br>Multiple comparison: 0 min, P>0.05; 15 min, P<0.001; 30 min, P<0.001; 60 min, P<0.001; 120 min, P>0.05      |
| <b>3G</b> | Wild-type (n=6)<br>Lep <sup>ob/ob</sup> (n=4)<br>Cadm2/ob (n=4) | Two-way repeated-measure ANOVA<br>Post-hoc multiple comparisons test (Sidak's) | Lep <sup>ob/ob</sup> vs Cadm2/ob:<br>Interaction: F=0.5025, P=0.7342<br>Time: F=32.44, P<0.0001<br>Genotype: F=4.328, P=0.0827<br>Multiple comparison: 0 min, P>0.05; 15 min, P>0.05; 30 min, P>0.05; 60 min, P>0.05; 120 min, P>0.05<br><u>Cadm2/ob vs Wild-type:</u><br>Interaction: F=3.155, P=0.0270<br>Time: F=32.38, P<0.0001<br>Genotype: F=32.58, P=0.0005<br>Multiple comparison: 0 min, P>0.05; 15 min, P<0.001; 30 min, P<0.01; 60 min, P>0.05; 120 min, P<0.05<br><u>Lep<sup>ob/ob</sup> &amp; Wild-type:</u><br>Interaction: F=6.764, P=0.0005<br>Time: F=42.83, P<0.0001<br>Genotype: F=46.20, P=0.0001<br>Multiple comparison: 0 min, P>0.05; 15 min, P<0.001; 30 min, P<0.001; 60 min, P<0.001; 120 min, P<0.01       |
| <b>3H</b> | Lep <sup>ob/ob</sup> (n=8)<br>Cadm2/ob (n=6)                    | Two-tailed unpaired Student's t-test                                           | day: t=2.051, P=0.0628<br>night: t=2.432, P=0.0316                                                                                                                                                                                                                                                                                                                                                                                                                                                                                                                                                                                                                                                                                    |
| <b>3I</b> | Lep <sup>ob/ob</sup> (n=8)<br>Cadm2/ob (n=6)                    | Two-tailed unpaired Student's t-test                                           | day: t=2.296, P=0.0390<br>night: t=2.596, P=0.0222                                                                                                                                                                                                                                                                                                                                                                                                                                                                                                                                                                                                                                                                                    |
| <b>3J</b> | Lep <sup>ob/ob</sup> (n=8)<br>Cadm2/ob (n=6)                    | Two-tailed unpaired Student's t-test                                           | day: t=0.9194, P=0.3760<br>night: t=0.6186, P=0.5477                                                                                                                                                                                                                                                                                                                                                                                                                                                                                                                                                                                                                                                                                  |
| <b>3K</b> | Lep <sup>ob/ob</sup> (n=8)<br>Cadm2/ob (n=6)                    | Two-tailed unpaired Student's t-test                                           | day: t=1.437, P=0.1764<br>night: t=4.406, P=0.0009                                                                                                                                                                                                                                                                                                                                                                                                                                                                                                                                                                                                                                                                                    |
| <b>3L</b> | Lep <sup>ob/ob</sup> (n=9)                                      | Two-tailed unpaired Student's t-test                                           | Mass/BW (%):                                                                                                                                                                                                                                                                                                                                                                                                                                                                                                                                                                                                                                                                                                                          |

|           |                                                                   |                                                                                |                                                                                                                                                                                                                                                                                                                                                                                                                                                                                                                                                                                                                                                                                                                                                                                                                         |
|-----------|-------------------------------------------------------------------|--------------------------------------------------------------------------------|-------------------------------------------------------------------------------------------------------------------------------------------------------------------------------------------------------------------------------------------------------------------------------------------------------------------------------------------------------------------------------------------------------------------------------------------------------------------------------------------------------------------------------------------------------------------------------------------------------------------------------------------------------------------------------------------------------------------------------------------------------------------------------------------------------------------------|
|           | Cadm2/ob (n=6)                                                    |                                                                                | fat: t=1.818, P=0.0921<br>LBM: t=1.919, P=0.0772<br>Mass:<br>BW: t=4.271, P=0.0009<br>fat: t=3.323, P=0.0055<br>LBM: t=0.1594, P=0.8758                                                                                                                                                                                                                                                                                                                                                                                                                                                                                                                                                                                                                                                                                 |
| <b>3M</b> | Lep <sup>ob/ob</sup> (n=8)<br>Cad2m2/ob (n=6)                     | Linear regression                                                              | F=7.1391, P=0.02172                                                                                                                                                                                                                                                                                                                                                                                                                                                                                                                                                                                                                                                                                                                                                                                                     |
| <b>3N</b> | Lep <sup>ob/ob</sup> (n=8)<br>Cad2m2/ob (n=6)                     | Linear regression                                                              | F=0.387647, P=0.5462                                                                                                                                                                                                                                                                                                                                                                                                                                                                                                                                                                                                                                                                                                                                                                                                    |
| <b>3O</b> | Lep <sup>ob/ob</sup> (n=8)<br>Cad2m2/ob (n=6)                     | Two-tailed unpaired Student's t-test                                           | t=1.778, P=0.1057                                                                                                                                                                                                                                                                                                                                                                                                                                                                                                                                                                                                                                                                                                                                                                                                       |
| <b>3Q</b> | Wild-type (n=9)<br>Cad2m2KO (n=6)                                 | Two-way repeated-measure ANOVA<br>Post-hoc multiple comparisons test (Sidak's) | Interaction: F=4.419, P=0.0091<br>Time: F=975.5, P<0.0001<br>Genotype: F=15.23, P=0.0018<br>Multiple comparison: **P<0.01                                                                                                                                                                                                                                                                                                                                                                                                                                                                                                                                                                                                                                                                                               |
| <b>3R</b> | Wild-type (n=9)<br>Cad2m2KO (n=6)                                 | Two-way repeated-measure ANOVA<br>Post-hoc multiple comparisons test (Sidak's) | Interaction: F=3.242, P=0.0190<br>Time: F=36.31, P<0.0001<br>Genotype: F=2.571, P=0.1329<br>Multiple comparison: *P<0.05                                                                                                                                                                                                                                                                                                                                                                                                                                                                                                                                                                                                                                                                                                |
| <b>3S</b> | Wild-type (n=9)<br>Cad2m2KO (n=6)                                 | Two-way repeated-measure ANOVA<br>Post-hoc multiple comparisons test (Sidak's) | Interaction: F=3.043, P=0.0250<br>Time: F=72.41, P<0.0001<br>Genotype: F=6.717, P=0.0224<br>Multiple comparison: *P<0.05, **P<0.01                                                                                                                                                                                                                                                                                                                                                                                                                                                                                                                                                                                                                                                                                      |
| <b>4A</b> | Wild-type (n=16)<br>Lep <sup>ob/ob</sup> (n=5)<br>Cad2m2/ob (n=4) | Two-tailed unpaired Student's t-test                                           | Lep <sup>ob/ob</sup> vs Cad2m2/ob: t=3.561, P=0.0092<br>Cad2m2/ob vs Wild-type: t=4.815, P<0.0001<br>Lep <sup>ob/ob</sup> vs Wild-type: t=8.130, P<0.0001                                                                                                                                                                                                                                                                                                                                                                                                                                                                                                                                                                                                                                                               |
| <b>4B</b> | Wild-type (n=4)<br>Lep <sup>ob/ob</sup> (n=5)<br>Cad2m2/ob (n=3)  | Two-tailed unpaired Student's t-test                                           | <u>ingWAT mass:</u><br>Lep <sup>ob/ob</sup> vs Cad2m2/ob: t=3.308, P=0.0162<br>Cad2m2/ob vs Wild-type: t=18.15, P<0.0001<br>Lep <sup>ob/ob</sup> vs Wild-type: t=18.03, P<0.0001<br><u>Liver mass:</u><br>Lep <sup>ob/ob</sup> vs Cad2m2/ob: t=2.554, P=0.0433<br>Cad2m2/ob vs Wild-ty: t=14.78, P=0.0043<br>Lep <sup>ob/ob</sup> vs Wild-type: t=11.43, P<0.0001                                                                                                                                                                                                                                                                                                                                                                                                                                                       |
| <b>4D</b> | Wild-type (n=5)<br>Lep <sup>ob/ob</sup> (n=6)<br>Cad2m2/ob (n=5)  | Two-tailed unpaired Student's t-test                                           | <u>Ucp1:</u><br>Lep <sup>ob/ob</sup> vs Cad2m2/ob: t=2.417, P=0.0388<br>Cad2m2/ob vs Wild-ty: t=2.461, P=0.0392<br>Lep <sup>ob/ob</sup> vs Wild-type: t=6.834, P<0.0001<br><u>Acadl:</u><br>Lep <sup>ob/ob</sup> vs Cad2m2/ob: t=2.687, P=0.0249<br>Cad2m2/ob vs Wild-ty: t=2.654, P=0.0291<br>Lep <sup>ob/ob</sup> vs Wild-type: t=7.048, P<0.0001<br><u>Prdm16:</u><br>Lep <sup>ob/ob</sup> vs Cad2m2/ob: t=2.379, P=0.0446<br>Cad2m2/ob vs Wild-ty: t=3.580, P=0.0090<br>Lep <sup>ob/ob</sup> vs Wild-type: t=5.403, P=0.0004<br><u>Pgc1α:</u><br>Lep <sup>ob/ob</sup> vs Cad2m2/ob: t=2.581, P=0.0417<br>Cad2m2/ob vs Wild-ty: t=3.965, P=0.0054<br>Lep <sup>ob/ob</sup> vs Wild-type: t=5.251, P=0.0012<br><u>Cidea:</u><br>Lep <sup>ob/ob</sup> vs Cad2m2/ob: t=3.399, P=0.0094<br>Cad2m2/ob vs Wild-ty: t=2.927, |

|           |                                                                   |                                      |                                                                                                                                                                                                                                                                                                                                                                                                                                                                                                                                                                                                                                                                                                                                                                                                                                                                                                                                                                                                                                                                                                                                                                                                                                                                                                                                            |
|-----------|-------------------------------------------------------------------|--------------------------------------|--------------------------------------------------------------------------------------------------------------------------------------------------------------------------------------------------------------------------------------------------------------------------------------------------------------------------------------------------------------------------------------------------------------------------------------------------------------------------------------------------------------------------------------------------------------------------------------------------------------------------------------------------------------------------------------------------------------------------------------------------------------------------------------------------------------------------------------------------------------------------------------------------------------------------------------------------------------------------------------------------------------------------------------------------------------------------------------------------------------------------------------------------------------------------------------------------------------------------------------------------------------------------------------------------------------------------------------------|
|           |                                                                   |                                      | <p>P=0.0221<br/> Lep<sup>ob/ob</sup> vs Wild-type: t=7.894,<br/> P&lt;0.0001</p> <p><u>Acadm:</u><br/> Lep<sup>ob/ob</sup> vs Cadm2/ob: t=3.384,<br/> P=0.0096<br/> Cadm2/ob vs Wild-ty: t=2.450,<br/> P=0.0441<br/> Lep<sup>ob/ob</sup> vs Wild-type: t=5.958,<br/> P=0.0002</p> <p><u>Cox8b:</u><br/> Lep<sup>ob/ob</sup> vs Cadm2/ob: t=3.105,<br/> P=0.0126<br/> Cadm2/ob vs Wild-ty: t=2.541,<br/> P=0.0347<br/> Lep<sup>ob/ob</sup> vs Wild-type: t=8.083,<br/> P&lt;0.0001</p> <p><u>Cox6a1:</u><br/> Lep<sup>ob/ob</sup> vs Cadm2/ob: t=3.663,<br/> P=0.0064<br/> Cadm2/ob vs Wild-ty: t=2.395,<br/> P=0.0478<br/> Lep<sup>ob/ob</sup> vs Wild-type: t=7.489,<br/> P&lt;0.0001</p> <p><u>Cox17:</u><br/> Lep<sup>ob/ob</sup> vs Cadm2/ob: t=2.474,<br/> P=0.0426<br/> Cadm2/ob vs Wild-ty: t=2.657,<br/> P=0.0326<br/> Lep<sup>ob/ob</sup> vs Wild-type: t=8.412,<br/> P&lt;0.0001</p>                                                                                                                                                                                                                                                                                                                                                                                                                                             |
| <b>4E</b> | Wild-type (n=5)<br>Lep <sup>ob/ob</sup> (n=3-6)<br>Cadm2/ob (n=5) | Two-tailed unpaired Student's t-test | <p><u>Ucp1:</u><br/> Lep<sup>ob/ob</sup> vs Cadm2/ob: t=4.474,<br/> P=0.0015<br/> Cadm2/ob vs Wild-ty: t=3.949,<br/> P=0.0055<br/> Lep<sup>ob/ob</sup> vs Wild-type: t=8.287,<br/> P&lt;0.0001</p> <p><u>Acadl:</u><br/> Lep<sup>ob/ob</sup> vs Cadm2/ob: t=0.1030,<br/> P=0.9213<br/> Cadm2/ob vs Wild-ty: t=4.495,<br/> P=0.0028<br/> Lep<sup>ob/ob</sup> vs Wild-type: t=4.484,<br/> P&lt;0.0029</p> <p><u>Prdm16:</u><br/> Lep<sup>ob/ob</sup> vs Cadm2/ob: t=1.771,<br/> P=0.1270<br/> Cadm2/ob vs Wild-ty: t=2.482,<br/> P=0.0421<br/> Lep<sup>ob/ob</sup> vs Wild-type: t=4.211,<br/> P=0.0040</p> <p><u>Pgc1α:</u><br/> Lep<sup>ob/ob</sup> vs Cadm2/ob: t=0.3523,<br/> P=0.7337<br/> Cadm2/ob vs Wild-ty: t=6.993,<br/> P&lt;0.0001<br/> Lep<sup>ob/ob</sup> vs Wild-type: t=12.65,<br/> P&lt;0.0001</p> <p><u>Cidea:</u><br/> Lep<sup>ob/ob</sup> vs Cadm2/ob: t=0.7771,<br/> P=0.4625<br/> Cadm2/ob vs Wild-ty: t=4.860,<br/> P=0.0013<br/> Lep<sup>ob/ob</sup> vs Wild-type: t=4.009,<br/> P=0.0051</p> <p><u>Acadm:</u><br/> Lep<sup>ob/ob</sup> vs Cadm2/ob: t=0.2704,<br/> P=0.7946<br/> Cadm2/ob vs Wild-ty: t=5.140,<br/> P=0.0013<br/> Lep<sup>ob/ob</sup> vs Wild-type: t=6.126,<br/> P=0.0003</p> <p><u>Cox8b:</u><br/> Lep<sup>ob/ob</sup> vs Cadm2/ob: t=1.587,<br/> P=0.1513<br/> Cadm2/ob vs Wild-ty: t=3.176,</p> |

|           |                                                                 |                                      |                                                                                                                                                                                                                                                                                                                                                                                                                                                                                                                                                                                                                                                                                                                                                                                                                                                                                                                                                                                                                                                                                                                                                                                                                    |
|-----------|-----------------------------------------------------------------|--------------------------------------|--------------------------------------------------------------------------------------------------------------------------------------------------------------------------------------------------------------------------------------------------------------------------------------------------------------------------------------------------------------------------------------------------------------------------------------------------------------------------------------------------------------------------------------------------------------------------------------------------------------------------------------------------------------------------------------------------------------------------------------------------------------------------------------------------------------------------------------------------------------------------------------------------------------------------------------------------------------------------------------------------------------------------------------------------------------------------------------------------------------------------------------------------------------------------------------------------------------------|
|           |                                                                 |                                      | <p>P=0.0131<br/> Lep<sup>ob/ob</sup> vs Wild-type: t=4.800,<br/> P=0.0014<br/> <u>Cox6a1:</u><br/> Lep<sup>ob/ob</sup> vs Cadm2/ob: t=0.7166,<br/> P=0.4918<br/> Cadm2/ob vs Wild-ty: t=3.690,<br/> P=0.0078<br/> Lep<sup>ob/ob</sup> vs Wild-type: t=3.852,<br/> P=0.0049<br/> <u>Cox17:</u><br/> Lep<sup>ob/ob</sup> vs Cadm2/ob: t=0.2850,<br/> P=0.7828<br/> Cadm2/ob vs Wild-ty: t=14.86,<br/> P&lt;0.0001<br/> Lep<sup>ob/ob</sup> vs Wild-type: t=15.00,<br/> P&lt;0.0001<br/> <u>Tmem26:</u><br/> Lep<sup>ob/ob</sup> vs Cadm2/ob: t=0.9594,<br/> P=0.3693<br/> Cadm2/ob vs Wild-ty: t=4.783,<br/> P=0.0014<br/> Lep<sup>ob/ob</sup> vs Wild-type: t=6.185,<br/> P=0.0005<br/> <u>Cd137:</u><br/> Lep<sup>ob/ob</sup> vs Cadm2/ob: t=1.976,<br/> P=0.0836<br/> Cadm2/ob vs Wild-ty: t=2.414,<br/> P=0.0423<br/> Lep<sup>ob/ob</sup> vs Wild-type: t=3.623,<br/> P=0.0068</p>                                                                                                                                                                                                                                                                                                                               |
| <b>4F</b> | Wild-type (n=5)<br>Lep <sup>ob/ob</sup> (n=4)<br>Cadm2/ob (n=4) | Two-tailed unpaired Student's t-test | <u>G6pc:</u><br>Lep <sup>ob/ob</sup> vs Cadm2/ob: t=4.307,<br>P=0.0006<br>Cadm2/ob vs Wild-ty: t=2.483,<br>P=0.0288<br>Lep <sup>ob/ob</sup> vs Wild-type: t=6.453,<br>P<0.0001<br><u>Pck:</u><br>Lep <sup>ob/ob</sup> vs Cadm2/ob: t=5.083,<br>P=0.0003<br>Cadm2/ob vs Wild-ty: t=2.791,<br>P=0.0210<br>Lep <sup>ob/ob</sup> vs Wild-type: t=7.292,<br>P<0.0001<br><u>Gck:</u><br>Lep <sup>ob/ob</sup> vs Cadm2/ob: t=3.225,<br>P=0.0180<br>Cadm2/ob vs Wild-ty: t=4.817,<br>P=0.0019<br>Lep <sup>ob/ob</sup> vs Wild-type: t=6.555,<br>P=0.0003<br><u>Slc2a2:</u><br>Lep <sup>ob/ob</sup> vs Cadm2/ob: t=4.176,<br>P=0.0058<br>Cadm2/ob vs Wild-ty: t=5.460,<br>P=0.0016<br>Lep <sup>ob/ob</sup> vs Wild-type: t=6.433,<br>P=0.0007<br><u>Fas:</u><br>Lep <sup>ob/ob</sup> vs Cadm2/ob: t=6.770,<br>P=0.0005<br>Cadm2/ob vs Wild-ty: t=6.417,<br>P=0.0004<br>Lep <sup>ob/ob</sup> vs Wild-type: t=10.27,<br>P<0.0001<br><u>Acc1:</u><br>Lep <sup>ob/ob</sup> vs Cadm2/ob: t=4.624,<br>P=0.0036<br>Cadm2/ob vs Wild-ty: t=3.595,<br>P=0.0088<br>Lep <sup>ob/ob</sup> vs Wild-type: t=8.598,<br>P<0.0001<br><u>Scd1:</u><br>Lep <sup>ob/ob</sup> vs Cadm2/ob: t=4.226,<br>P=0.0055<br>Cadm2/ob vs Wild-ty: t=4.856, |

|                      |                                                                          |                                                                                   |                                                                                                                                                                                                                                                                                                                                                                                                                                                                                               |
|----------------------|--------------------------------------------------------------------------|-----------------------------------------------------------------------------------|-----------------------------------------------------------------------------------------------------------------------------------------------------------------------------------------------------------------------------------------------------------------------------------------------------------------------------------------------------------------------------------------------------------------------------------------------------------------------------------------------|
|                      |                                                                          |                                                                                   | <p>P=0.0018<br/> Lep<sup>ob/ob</sup> vs Wild-type: t=14.78,<br/> P&lt;0.0001<br/> <u>Fgf21:</u><br/> Lep<sup>ob/ob</sup> vs Cadm2/ob: t=11.07,<br/> P&lt;0.0001<br/> Cadm2/ob vs Wild-typ: t=9.178,<br/> P&lt;0.0001<br/> Lep<sup>ob/ob</sup> vs Wild-type: t=35.01,<br/> P&lt;0.0001<br/> <u>Hmgcs2:</u><br/> Lep<sup>ob/ob</sup> vs Cadm2/ob: t=4.451,<br/> P=0.0043<br/> Cadm2/ob vs Wild-typ: t=4.457,<br/> P=0.0029<br/> Lep<sup>ob/ob</sup> vs Wild-type: t=7.427,<br/> P&lt;0.0001</p> |
| <b>Suppl.<br/>1B</b> | Wild-type (n=4)<br>Cadm2KO (n=4)                                         | Two-way repeated-measure ANOVA<br>Post-hoc multiple comparisons test<br>(Sidak's) | <p><u>Food intake (Leptin):</u><br/> Interaction: F=1.853, P=0.1023<br/> Time: F=23.23, P&lt;0.0001<br/> Genotype: F=0.0763, P=0.7916<br/> <u>Body weight (Leptin):</u><br/> Interaction: F=3.343, P=0.0101<br/> Time: F=42.26, P&lt;0.0001<br/> Genotype: F=0.3072, P=0.5994<br/> Multiple comparison: *P&lt;0.05,<br/> **P&lt;0.01</p>                                                                                                                                                      |
| <b>Suppl.<br/>1B</b> | Wild-type (n=5)<br>Cadm2KO (n=6)                                         | Two-way repeated-measure ANOVA<br>Post-hoc multiple comparisons test<br>(Sidak's) | <p><u>Food intake (PBS):</u><br/> Interaction: F=0.9279, P=0.4825<br/> Time: F=6.305, P&lt;0.0001<br/> Genotype: F=0.001062, P=0.9747<br/> <u>Body weight (PBS):</u><br/> Interaction: F=1.28, P=0.2822<br/> Time: F=3.761, P=0.0034<br/> Genotype: F=1.661, P=0.2295</p>                                                                                                                                                                                                                     |
| <b>Suppl.<br/>1C</b> | Lep <sup>ob/ob</sup> + PBS (n=4),<br>Lep <sup>ob/ob</sup> + leptin (n=3) | Two-way repeated-measure ANOVA<br>Post-hoc multiple comparisons test<br>(Sidak's) | <p><u>Food intake:</u><br/> Interaction: F=7.157, P=0.0006<br/> Time: F=5.13, P&lt;0.0001<br/> Genotype: F=25.5, P=0.0072<br/> Multiple comparison: *P&lt;0.05,<br/> **P&lt;0.01<br/> <u>Body weight:</u><br/> Interaction: F=24.41, P &lt;0.0001<br/> Time: F=10.58, P&lt;0.0001<br/> Genotype: F=27.08, P=0.0065<br/> Multiple comparison: *P&lt;0.05,<br/> **P&lt;0.01</p>                                                                                                                 |
